# Supplementary material for: Microbial Community and Enzyme Activity of Forest Plantation, Natural Forests, and Agricultural Land in Chilean Coastal Cordillera Soils
Source: MDPI journal article supplement (doi:10.3390/f14050938), 2023-05-03
Supplement: s1 [file s1]

## Supplementary Tables belonging to the manuscript:

Microbial community and enzymatic activities on natural forest, forest plantations and cropping soils.

**Table S1** Results of a three-way ANOVA about the effect of land-use-change, soil horizon, season, and their interactions on enzyme activities: a) Cellulase, b) FDA and c) Urease activity.

| a) Cellulase activity |                |                    |         |                              |
|-----------------------|----------------|--------------------|---------|------------------------------|
| Source of variation   | Sum of squares | Degrees of freedom | F ratio | P value                      |
| Ecosystem (a)         | 56.530         | 3                  | 32.826  | $1.09 \times 10^{-14}$ ***   |
| Soil Horizon(b)       | 25.979         | 1                  | 45.256  | $1.25 \times 10^{-9}$ ***    |
| Season(c)             | 87.059         | 5                  | 30.332  | $< 2.00 \times 10^{-16}$ *** |
| a x b                 | 41.152         | 3                  | 23.896  | $1.23 \times 10^{-11}$ ***   |
| a x c                 | 44.537         | 15                 | 5.172   | $2.00 \times 10^{-7}$ ***    |
| b x c                 | 6.006          | 5                  | 2.093   | 0.01629                      |
| a x b x c             | 18.516         | 15                 | 2.150   | 0.0334 *                     |
| Error                 | 55.108         | 96                 |         |                              |
| b) FDA                |                |                    |         |                              |
| Source of variation   | Sum of squares | Degrees of freedom | F ratio | P value                      |
| Ecosystem (a)         | 499.495        | 3                  | 51.30   | $< 2 \times 10^{-16}$ ***    |
| Soil Horizon(b)       | 130.506        | 1                  | 40.21   | $7.43 \times 10^{-9}$ ***    |
| Season(c)             | 361.890        | 5                  | 22.30   | $8.97 \times 10^{-15}$ ***   |
| a x b                 | 67.882         | 3                  | 6.97    | 0.000271 ***                 |
| a x c                 | 284.433        | 15                 | 5.84    | $2.10 \times 10^{-8}$ ***    |
| b x c                 | 17.772         | 5                  | 1.09    | 0.368145                     |
| a x b x c             | 53.820         | 15                 | 1.00    | 0.362069                     |
| Error                 | 31.155.7       | 96                 |         |                              |
| c) Urease activity    |                |                    |         |                              |
| Source of variation   | Sum of squares | Degrees of freedom | F ratio | P value                      |
| Ecosystem (a)         | 1.988.080      | 3                  | 101.888 | $< 2 \times 10^{-16}$ ***    |
| Soil Horizon(b)       | 36.099         | 1                  | 5.550   | 0.0205 *                     |
| Season(c)             | 2.032.733      | 5                  | 30.332  | $< 2 \times 10^{-16}$ ***    |
| a x b                 | 75.742         | 3                  | 3.882   | 0.0115 *                     |
| a x c                 | 669.840        | 15                 | 6.866   | $7.39 \times 10^{-10}$ ***   |
| b x c                 | 61.214         | 5                  | 1.882   | 0.1045                       |
| a x b x c             | 97.576         | 15                 | 1.000   | 0.4616                       |
| Error                 | 62.4397        | 96                 |         |                              |

**Table S2.** Pearson correlation coefficients between biological and physicochemical variables from soils under different land uses.

| Parameter | Richness | Shannon | Richness  | Shannon | Celulase | FDA  | Urease |
|-----------|----------|---------|-----------|---------|----------|------|--------|
|           | Fungal   |         | Bacterium |         | Activity |      |        |
| pH        | -0.50    | -0.46   | n.s       | n.s     | n.s      | n.s  | n.s    |
| SOM       | n.s      | n.s     | -0.41     | -0.48   | 0.54     | 0.60 | 0.57   |
| N         | n.s      | n.s     | -0.41     | -0.49   | 0.50     | 0.51 | 0.50   |
| P         | n.s      | n.s     | -0.50     | -0.57   | 0.51     | 0.47 | 0.47   |
| Al        | -0.53    | n.s     | n.s       | n.s     | n.s      | n.s  | n.s    |
| K         | -0.45    | n.s     | n.s       | n.s     | n.s      | n.s  | n.s    |

|                |       |       |       |       |      |       |       |
|----------------|-------|-------|-------|-------|------|-------|-------|
| Ca             | -0.43 | n.s   | -0.57 | -0.60 | 0.41 | n.s   | n.s   |
| Mg             | -0.48 | n.s   | -0.48 | -0.50 | n.s  | n.s   | n.s   |
| Na             | -0.45 | -0.46 | n.s   | n.s   | n.s  | n.s   | n.s   |
| SB             | n.s   | -0.50 | -0.53 | 0.44  | n.s  | n.s   | n.s   |
| CICE           | n.s   | n.s   | -0.54 | -0.57 | 0.45 | n.s   | n.s   |
| AlS            | n.s   | 0.50  | 0.43  | n.s   | n.s  | n.s   | n.s   |
| Ks             | n.s   | n.s   | n.s   | n.s   | n.s  | -0.59 | n.s   |
| Cas            | -0.62 | -0.49 | n.s   | n.s   | n.s  | n.s   | n.s   |
| Sd             | n.s   | n.s   | -0.48 | -0.55 | 0.63 | 0.65  | 0.55  |
| Mn             | n.s   | n.s   | n.s   | -0.46 | 0.47 | 0.60  | 0.63  |
| Zn             | n.s   | n.s   | -0.46 | -0.53 | 0.61 | 0.57  | 0.53  |
| Cu             | n.s   | n.s   | -0.44 | -0.49 | 0.45 | 0.50  | 0.53  |
| B              | n.s   | n.s   | n.s   | n.s   | n.s  | 0.56  | 0.49  |
| Clay           | n.s   | n.s   | n.s   | n.s   | 0.51 | 0.65  | 0.52  |
| Silt           | -0.46 | -0.55 | n.s   | n.s   | n.s  | -0.66 | -0.58 |
| Sand           | -0.46 | -0.54 | n.s   | n.s   | n.s  | -0.66 | -0.60 |
| Q <sub>b</sub> | 0.42  | 0.48  | n.s   | n.s   | n.s  | n.s   | n.s   |

n.s = No significant at  $p < 0.05$ .

**Table S3.** Phylogenetic assignment bacteria of major DGGE bands Bacteria A-h horizon.

| OUT no.                               | Lineage (Taxonomic group) <sup>a</sup>                                                                | The closest species (accession no.)                    | Pairwise Similarity (%) |
|---------------------------------------|-------------------------------------------------------------------------------------------------------|--------------------------------------------------------|-------------------------|
| <i>Natural Forest Ah (0-18 cm)</i>    |                                                                                                       |                                                        |                         |
| 1                                     | <i>Acidobacteriaceae; Acidobacterium</i>                                                              | Uncultured <i>Acidobacterium</i> (JX114382.1.)         | 97%                     |
| 2                                     | <i>Bacterium; Proteobacteria; Alphaproteobacteria; Rhizobiales; anthobacteraceae; Pseudolabrys.</i>   | Uncultured <i>Pseudolabrys</i> sp. (JX505115.1)        | 99%                     |
| 3                                     | <i>Bacterium</i>                                                                                      | <i>Bacillus cereus</i> strain (KP120954.1)             | 77%                     |
| 4                                     | <i>Bacterium; Proteobacteria; Alphaproteobacteria; Rhizobiales. Bradyrhizobiaceae; Bradyrhizobium</i> | <i>Bradyrhizobium</i> sp. (FN600560.2)                 | 98%                     |
| 10                                    | <i>Bacterium; Proteobacteria; Alphaproteobacteria; Rhizobiales; Bradyrhizobiaceae.</i>                | Uncultured <i>Radyrhizobium</i> Sp. (KJ410572.1)       | 92%                     |
| 12                                    | <i>Bacterium</i>                                                                                      | Uncultured bacterium (jq695958.1)                      | 90%                     |
| 14                                    | <i>Bacterium; Acidobacteria.</i>                                                                      | Uncultured <i>Bacterium Acidobacteria</i> (Gu374361.1) | 84%                     |
| 18                                    | <i>Bacterium; Gemmatimonadetes; Gemmatimonadales; Gemmatimonadaceae; Gemmatimonas.</i>                | Uncultured <i>Gemmatimonas</i> Sp. (Jq087111.1)        | 97%                     |
| <i>Young plantation A-h (0-18 cm)</i> |                                                                                                       |                                                        |                         |
| 2                                     | <i>Bacterium; Proteobacteria; Alphaproteobacteria; Rhizobiales; anthobacteraceae; Pseudolabrys.</i>   | Uncultured <i>Pseudolabrys</i> sp. (JX505115.1)        | 99%                     |
| 3                                     | <i>Bacterium</i>                                                                                      | <i>Bacillus cereus</i> strain (KP120954.1)             | 77%                     |
| 10                                    | <i>Bacterium; Proteobacteria; Alphaproteobacteria; Rhizobiales; Bradyrhizobiaceae.</i>                | Uncultured <i>Bradyrhizobium</i> sp. (kj410572.1)      | 92%                     |
| 12                                    | <i>Bacterium</i>                                                                                      | Uncultured bacterium (jq695958.1)                      | 90%                     |
| 14                                    | <i>Bacterium; Acidobacteria.</i>                                                                      | Uncultured <i>Bacterium Acidobacteria</i> (Gu374361.1) | 84%                     |

|                                  |                                                                                                 |                                                    |     |
|----------------------------------|-------------------------------------------------------------------------------------------------|----------------------------------------------------|-----|
| 16                               | Bacterium; Actinobacteria                                                                       | Uncultured Actinobacterium.<br>(Ef378837.1)        | 98% |
| 18                               | Bacterium; Gemmatimonadetes; Gemmatimonadales; Gemmatimonadaceae; Gemmatimonas.                 | Uncultured Gemmatimonas Sp. (Jq087111.1)           | 97% |
| Adult plantation A-h (0-18 cm)   |                                                                                                 |                                                    |     |
| 2                                | Bacterium; Proteobacteria; Alphaproteobacteria; Rhizobiales; anthobacteraceae; Pseudolabrys.    | Uncultured Pseudolabrys sp.<br>(JX505115.1)        | 99% |
| 10                               | Bacterium; Proteobacteria; Alphaproteobacteria; Rhizobiales; Bradyrhizobiaceae; Bradyrhizobium. | Uncultured Bradyrhizobium Sp. (Kj410572.1)         | 92% |
| 12                               | Bacterium                                                                                       | Uncultured Bacterium.<br>(Jq695958.1)              | 90% |
| 14                               | Bacterium; Acidobacteria.                                                                       | Uncultured Bacterium Acidobacteria<br>(Gu374361.1) | 84% |
| 16                               | Bacterium; Actinobacteria                                                                       | Uncultured Actinobacterium.<br>(Ef378837.1)        | 98% |
| 18                               | Bacterium; Gemmatimonadetes; Gemmatimonadales; Gemmatimonadaceae; Gemmatimonas.                 | Uncultured Gemmatimonas Sp. (Jq087111.1)           | 97% |
| Agricultural Crops A-h (0-18 cm) |                                                                                                 |                                                    |     |
| 2                                | Bacterium; Proteobacteria; Alphaproteobacteria; Rhizobiales; anthobacteraceae; Pseudolabrys.    | Uncultured Pseudolabrys sp.<br>(JX505115.1)        | 99% |
| 10                               | Bacterium; Proteobacteria; Alphaproteobacteria; Rhizobiales; Bradyrhizobiaceae; Bradyrhizobium. | Uncultured Bradyrhizobium Sp. (Kj410572.1)         | 92% |
| 12                               | Bacterium                                                                                       | Uncultured bacterium (jq695958.1)                  | 90% |
| 18                               | Bacterium; Gemmatimonadetes; Gemmatimonadales; Gemmatimonadaceae; Gemmatimonas.                 | Uncultured Gemmatimonas Sp. (Jq087111.1)           | 97% |

<sup>a</sup>the phylogenetic assignment is based on sequences analysis by megablast of GenBank database from NCBI (<http://www.ncbi.nlm.nih.gov>). It is given the phylum as well as the lowest predictable phylogenetic rank.

**Table S4.** Phylogenetic assignment bacteria of major DGGE bands Bacteria B-h.

| Bands                         | Taxonomic groups                                                              | Closest relatives or cloned sequences (accession no.) <sup>c</sup> | Similarity |
|-------------------------------|-------------------------------------------------------------------------------|--------------------------------------------------------------------|------------|
| Natural Forest A-h (18-50 cm) |                                                                               |                                                                    |            |
| 1                             | Bacterium; Actinobacteria; Streptomycetales; Streptomycetaceae; Streptomyces. | Streptomyces sp. (genbank: kt591698.1)                             | 98%        |
| 2                             | Bacterium;                                                                    | Uncultured bacterium (Genbank: jn642995.1)                         | 86%        |
| 3                             | Bacterium;                                                                    | Uncultured bacterium (Genbank: gq264391.1)                         | 99%        |

|                                 |                                                                                                                            |                                                                     |     |
|---------------------------------|----------------------------------------------------------------------------------------------------------------------------|---------------------------------------------------------------------|-----|
| 4                               | Bacterium;                                                                                                                 | Uncultured bacterium<br>(Genbank: kj014532.1)                       | 96% |
| 5                               | Bacterium;                                                                                                                 | Uncultured bacterium<br>(Genbank: hq462560.1)                       | 99% |
| 6                               | Bacterium;                                                                                                                 | Uncultured bacterium<br>(GenBank: JN839677.1)                       | 96% |
| 7                               | Bacterium;                                                                                                                 | Uncultured bacterium<br>(GenBank: HQ598188.1)                       | 98% |
| 8                               | Bacterium;                                                                                                                 | Uncultured <i>Proteobacterium</i><br>(genbank: fr832343.1)          | 95% |
| 9                               | Bacterium                                                                                                                  | Uncultured Bacterium<br>(GenBank: AF524860.1)                       | 97% |
| 10                              | Bacterium; <i>Actinobacteria</i> ; <i>Micrococcales</i> ; <i>Micrococcaceae</i> ;                                          | <i>Arthrobacter</i> sp.<br>(Genbank: kx036596.1)                    | 90% |
| 11                              | Bacterium;                                                                                                                 | Uncultured bacterium<br>(GenBank: GU598641.1)                       | 84% |
| 12                              | Bacterium; <i>Proteobacterium</i> ; <i>Alphaproteobacteria</i> ;                                                           | Uncultured<br><i>Alpha proteobacterium</i><br>(Genbank: ef220681.1) | 90% |
| 13                              | Bacterium;                                                                                                                 | Uncultured bacterium<br>(Genbank: fj433095.1)                       | 84% |
| 17                              | <i>Proteobacterium</i> , <i>Proteobacterium</i> ; <i>Betaproteobacterium</i> ;                                             | Uncultured<br><i>beta proteobacterium</i><br>(Genbank: kj750911.1)  | 99% |
| 18                              | <i>Bacterium</i> ; <i>Gemmatimonadetes</i> ; <i>Gemmatimonadales</i> ; <i>Gemmatimonadaceae</i> ;<br><i>Gemmatimonas</i> . | Uncultured <i>Gemmatimonas</i> Sp.<br>(Genbank: Jq087111.1)         | 97% |
| Young plantation A-h (18 -50cm) |                                                                                                                            |                                                                     |     |
| 4                               | Bacterium;                                                                                                                 | Uncultured bacterium<br>(Genbank: kj014532.1)                       | 96% |
| 5                               | Bacterium;                                                                                                                 | Uncultured bacterium<br>(Genbank: hq462560.1)                       | 99% |
| 9                               | Bacterium                                                                                                                  | Uncultured Bacterium<br>(GenBank: AF524860.1)                       | 97% |
| 10                              | Bacterium; <i>Actinobacteria</i> ; <i>Micrococcales</i> ; <i>Micrococcaceae</i> .                                          | <i>Arthrobacter</i> sp.<br>(Genbank: kx036596.1)                    | 90% |
| 11                              | Bacterium;                                                                                                                 | Uncultured bacterium<br>(GenBank: GU598641.1)                       | 84% |
| 12                              | Bacterium; <i>Proteobacterium</i> ; <i>Alphaproteobacteria</i> .                                                           | Uncultured<br><i>Alpha proteobacterium</i><br>(Genbank: ef220681.1) | 90% |
| 13                              | Bacterium;                                                                                                                 | Uncultured bacterium<br>(Genbank: fj433095.1)                       | 84% |
| 17                              | <i>Proteobacterium</i> , <i>Proteobacterium</i> ; <i>Betaproteobacterium</i> .                                             | Uncultured<br><i>Beta proteobacterium</i><br>(Genbank: kj750911.1)  | 99% |
| 19                              | <i>Bacterium</i> ; <i>Gemmatimonadetes</i> ; <i>Gemmatimonadales</i> .                                                     | Uncultured bacterium <i>Gemmatimonadaceae</i> (GenBank: KJ750948.1) | 89% |

| Adult plantation A-h (18-50 cm)           |                                                                                        |                                                                     |     |
|-------------------------------------------|----------------------------------------------------------------------------------------|---------------------------------------------------------------------|-----|
| 4                                         | Bacterium;                                                                             | Uncultured bacterium<br>(Genbank: kj014532.1)                       | 96% |
| 5                                         | Bacterium;                                                                             | Uncultured bacterium<br>(Genbank: hq462560.1)                       | 99% |
| 7                                         | Bacterium;                                                                             | Uncultured bacterium<br>(GenBank: HQ598188.1)                       | 98% |
| 8                                         | Bacterium;                                                                             | Uncultured<br><i>Proteobacterium</i><br>(Genbank: fr832343.1)       | 95% |
| 9                                         | Bacterium                                                                              | Uncultured Bacterium<br>(GenBank: AF524860.1)                       | 97% |
| 10                                        | Bacterium; <i>Actinobacteria; Micrococcales; Micrococcaceae.</i>                       | <i>Arthrobacter sp.</i><br>(Genbank: kx036596.1)                    | 90% |
| 13                                        | Bacterium;                                                                             | Uncultured bacterium<br>(Genbank: fj433095.1)                       | 84% |
| 17                                        | <i>Proteobacterium, Proteobacterium; Betaproteobacterium.</i>                          | Uncultured<br><i>beta proteobacterium</i><br>(Genbank: kj750911.1)  | 99% |
| 18                                        | <i>Bacterium; Gemmatimonadetes; Gemmatimonadales; Gemmatimonadaceae; Gemmatimonas.</i> | Uncultured<br><i>Gemmatimonas Sp.</i><br>(Genbank: Jq087111)        | 97% |
| 19                                        | <i>Bacterium; Gemmatimonadetes; Gemmatimonadalel.</i>                                  | Uncultured bacterium <i>Gemmatimonadaceae</i> (GenBank: KJ750948.1) | 89% |
| Agricultural Crops B-h horizon (18 -50cm) |                                                                                        |                                                                     |     |
| 4                                         | Bacterium;                                                                             | Uncultured bacterium<br>(Genbank: kj014532.1)                       | 96% |
| 5                                         | Bacterium;                                                                             | Uncultured bacterium<br>(Genbank: hq462560.1)                       | 99% |
| 9                                         | Bacterium                                                                              | Uncultured Bacterium<br>(GenBank: AF524860.1)                       | 97% |
| 10                                        | Bacterium; <i>Actinobacteria; Micrococcales; Micrococcaceae.</i>                       | <i>Arthrobacter sp.</i><br>(Genbank: kx036596.1)                    | 90% |
| 11                                        | Bacterium;                                                                             | Uncultured bacterium<br>(GenBank: GU598641.1)                       | 84% |
| 12                                        | <i>Bacterium; Proteobacterium; Alphaproteobacterium.</i>                               | Uncultured<br><i>Alpha proteobacterium</i><br>(Genbank: ef220681.1) | 90% |
| 13                                        | Bacterium;                                                                             | Uncultured bacterium<br>(Genbank: fj433095.1)                       | 84% |
| 17                                        | <i>Proteobacterium, Proteobacterium; Betaproteobacterium.</i>                          | Uncultured<br><i>Beta proteobacterium</i><br>(Genbank: kj750911.1)  | 99% |
| 18                                        | <i>Bacterium; Gemmatimonadetes; Gemmatimonadales; Gemmatimonadaceae; Gemmatimonas.</i> | Uncultured<br><i>Gemmatimonas Sp.</i><br>(Genbank: Jq087111)        | 97% |
| 19                                        | <i>Bacterium; Gemmatimonadetes; Gemmatimonadales.</i>                                  | Uncultured bacterium <i>Gemmatimonadaceae</i>                       | 89% |

(GenBank: KJ750948.1)

<sup>a</sup>the phylogenetic assignment is based on sequences analysis by megablast of GenBank database from NCBI (<http://www.ncbi.nlm.nih.gov>). It is given the phylum as well as the lowest predictable phylogenetic rank.

**Table S5.** Phylogenetic assignment fungi of major DGGE bands Fungal A-h horizon.

| Bands                                 | Taxonomic group <sup>a</sup>                                                                                                                                                                 | Closest relatives or cloned sequences<br>(accession no.) | Similarity |
|---------------------------------------|----------------------------------------------------------------------------------------------------------------------------------------------------------------------------------------------|----------------------------------------------------------|------------|
| <b>Natural Forest A-h (0-18 cm)</b>   |                                                                                                                                                                                              |                                                          |            |
| 1                                     | Fungi; Dikarya; Basidiomycota <i>Agaricomycotina</i> ;<br><i>Agaricomycetes</i> ; <i>Thelephorales</i> ; <i>Thelephoraceae</i>                                                               | Uncultured <i>Tomentella</i><br>(Genbank: EU625921.1)    | 94%        |
| 2                                     | Fungi; Dikarya; Ascomycota; <i>Pezizomycotina</i> ; <i>Leoti-</i><br><i>omycetes</i> ; <i>Helotiales</i> ; <i>Chaetomellaceae</i> ; <i>Chaetomella</i>                                       | <i>Chaetomella Acutiseta</i><br>(Genbank: Ay544728.1)    | 99%        |
| 3                                     | Fungi                                                                                                                                                                                        | Uncultured fungus<br>(Genbank: EF628705.1)               | 97%        |
| 4                                     | Fungi; Dikarya; Basidiomycota; <i>Agaricomy-</i><br><i>cotina</i> ; <i>Agaricomycetes</i> ; <i>Russulales</i> ; <i>Russulaceae</i> ; <i>Lac-</i><br><i>tarius</i>                            | <i>Lactarius southworthiae</i><br>(Genbank: kf386755.1)  | 98%        |
| 5                                     | Fungi; Dikarya; Basidiomycota; <i>Agaricomy-</i><br><i>cotina</i> ; <i>Agaricomycetes</i> ; <i>Cantharellales</i> ; <i>Cantharellaceae</i> ;<br><i>Craterellus</i> .                         | <i>Craterellus tubaeformis</i><br>(GenBank: DQ898683.1)  | 89%        |
| 8                                     | <i>Alveolata</i> ; <i>Apicomplexa</i> ; <i>Conoidasida</i> ; <i>Coccidia</i> ; <i>Eucoc-</i><br><i>cidiorida</i> ; <i>Eimeriorina</i> ; <i>Eimeriidae</i> .                                  | <i>Eimeriidae</i><br>(Genbank: ef024843.1)               | 96%        |
| 9                                     | Fungi; Dikarya; Ascomycota; <i>Pezizomycotina</i> ; <i>Leoti-</i><br><i>omycetes</i> ; <i>Leotiomyces incertae sedis</i> ; <i>Myxotrichaceae</i> ;<br><i>Byssoascus</i> .                    | <i>Byssoascus striatosporus</i> (Genbank:<br>af222535.1) | 99%        |
| 12                                    | Fungi; <i>Glomeromycota</i> ; <i>Glomeromycetes</i> ; <i>Archaeospo-</i><br><i>rales</i> <i>Archaeosporaceae</i> .                                                                           | Uncultured <i>archaeospora</i><br>(Genbank: am420394.1)  | 99%        |
| 15                                    | Fungi; Dikarya; Basidiomycota; <i>Agaricomycotina</i> ;<br><i>Agaricomycetes</i> ; <i>Agaricomycetidae</i> ; <i>Agaricales</i> ; <i>Agari-</i><br><i>caceae</i> .                            | <i>Agaricus bisporus</i><br>(Genbank: AY787216.1)        | 94%        |
| 16                                    | Fungi; Dikarya; Ascomycota; <i>Pezizomycotina</i> ; <i>Leo-</i><br><i>tiomyces</i> ; <i>Leotiomyces incertae sedis</i> ; <i>Collophora</i>                                                   | <i>Collophora rubra</i><br>(Genbank: GQ154627.1)         | 98%        |
| 17                                    | Fungi; <i>Glomeromycota</i> ; <i>Glomeromycetes</i> ; <i>Archaeospo-</i><br><i>rales</i> ; <i>Archaeosporaceae</i> .                                                                         | Uncultured <i>Archaeospora</i><br>(GenBank: AM420394.1)  | 99%        |
| 18                                    | Fungi incertae sedis; unclassified <i>zygomycetes</i>                                                                                                                                        | <i>Zygomycete sp</i><br>(GenBank :EU428774.1)            | 95%        |
| <b>Young plantation A-h (0-18 cm)</b> |                                                                                                                                                                                              |                                                          |            |
| 1                                     | Fungi; Dikarya; Basidiomycota <i>Agaricomycotina</i> ;<br><i>Agaricomycetes</i> ; <i>Thelephorales</i> ; <i>Thelephoraceae</i>                                                               | Uncultured <i>Tomentella</i><br>(Genbank: EU625921.1)    | 94%        |
| 2                                     | Fungi; Dikarya; Ascomycota; <i>Pezizomycotina</i> ; <i>Leoti-</i><br><i>omycetes</i> ; <i>Helotiales</i> ; <i>Chaetomellaceae</i> ; <i>Chaetomella</i>                                       | <i>Chaetomella Acutiseta</i><br>(Genbank: Ay544728.1)    | 99%        |
| 5                                     | Fungi; Dikarya; Basidiomycota; <i>Agaricomy-</i><br><i>cotina</i> ; <i>Agaricomycetes</i> ; <i>Cantharellales</i> ; <i>Cantharellaceae</i> ;<br><i>Craterellus</i> .                         | <i>Craterellus tubaeformis</i> (GenBank<br>:DQ898683.1)  | 90%        |
| 6                                     | Fungi; Dikarya; Basidiomycota; <i>Agaricomycotina</i> ;<br><i>Agaricomycetes</i> ; <i>Russulales</i> ; <i>Russulaceae</i> ; <i>Lactarius</i>                                                 | <i>Lactarius southworthiae</i><br>(GenBank :KF386755.1)  | 93%        |
| 7                                     | Fungi; Dikarya; Basidiomycota; <i>Pucciniomy-</i><br><i>cotina</i> ; <i>Microbotryomycetes</i> ; <i>Sporidiobolales</i> ; <i>mitosporic</i><br><i>Sporidiobolales</i> ; <i>Rhodotorula</i> . | <i>Rhodotorula graminis</i><br>(GenBank :HM371376.1)     | 99%        |

|                                  |                                                                                                                                |                                                            |     |
|----------------------------------|--------------------------------------------------------------------------------------------------------------------------------|------------------------------------------------------------|-----|
| 8                                | Alveolata; Apicomplexa; Conoidasida; Coccidia; Eucoccidiorida; Eimeriorina; Eimeriidae.                                        | Eimeriidae<br>(GenBank:EF024843.1)                         | 96% |
| 16                               | Fungi; Dikarya; Ascomycota; Pezizomycotina; Leotiomycetes; Leotiomycetes incertae sedis; Collophora.                           | Collophora rubra<br>(GenBank:Q154627.1)                    | 16  |
| Adult plantation A-h (0-18 cm)   |                                                                                                                                |                                                            |     |
| 2                                | Fungi; Dikarya; Ascomycota; Pezizomycotina; Leotiomycetes; Helotiales; Chaetomellaceae; Chaetomella.                           | Chaetomella Acutiseta (Genbank: Ay544728.1)                | 99% |
| 3                                | Eukaryota; Fungi                                                                                                               | Uncultured fungus<br>(GenBank:EF628705.1)                  | 97% |
| 6                                | Fungi; Dikarya; Basidiomycota; Agaricomycotina; Agaricomycetes; Russulales; Russulaceae; Lactarius.                            | Lactarius southworthiae<br>(GenBank:KF386755.1)            | 93% |
| 8                                | Fungi; Dikarya; Basidiomycota; Pucciniomycotina; Microbotryomycetes; Sporidiobolales; mitosporic Sporidiobolales; Rhodotorula. | Rhodotorula graminis (GenBank: HM371376.1)                 | 99% |
| 9                                | Fungi; Dikarya; Ascomycota; Pezizomycotina; Leotiomycetes; Leotiomycetes incertae sedis; Myxotrichaceae; Byssosascus.          | Byssosascus triatosporus (GenBank: AF222535.1)             | 99% |
| 11                               | Fungi; Dikarya; Basidiomycota; Agaricomycotina; Agaricomycetes                                                                 | Uncultured Agaricomycetes (GenBank: FJ554148.1)            | 97% |
| 12                               | Fungi; Glomeromycota; Glomeromycetes; Archaeosporales Archaeosporaceae.                                                        | Uncultured archaeospora<br>(Genbank: am420394.1)           | 99% |
| 16                               | Fungi; Dikarya; Ascomycota; Pezizomycotina; Leotiomycetes; Leotiomycetes incertae sedis; Collophora.                           | Collophora rubra<br>(GenBank:Q154627.1)                    | 16  |
| Agricultural Crops A-h (0-18 cm) |                                                                                                                                |                                                            |     |
| 1                                | Fungi; Dikarya; Basidiomycota Agaricomycotina; Agaricomycetes; Thelephorales; Thelephoraceae.                                  | Uncultured Tomentella<br>(Genbank: EU625921.1)             | 94% |
| 2                                | Fungi; Dikarya; Ascomycota; Pezizomycotina; Leotiomycetes; Helotiales; Chaetomellaceae; Chaetomella.                           | Chaetomella Acutiseta<br>(Genbank: Ay544728.1)             | 99% |
| 6                                | Fungi; Dikarya; Basidiomycota; Agaricomycotina; Agaricomycetes; Russulales; Russulaceae; Lactarius.                            | Lactarius southworthiae<br>(GenBank:KF386755.1)            | 93% |
| 8                                | Fungi; Dikarya; Basidiomycota; Pucciniomycotina; Microbotryomycetes; Sporidiobolales; mitosporic Sporidiobolales; Rhodotorula. | Rhodotorula graminis (GenBank: HM371376.1)                 | 99% |
| 13                               | Fungi; Glomeromycota; Glomeromycetes; Archaeosporales; Archaeosporaceae.                                                       | Uncultured Archaeospora (Genbank: AM420394.1)              | 93% |
| 14                               | Fungi; Chytridiomycota; Chytridiomycetes; Polychytriales; Neokarlingia.                                                        | Neokarlingia chitinophila voucher<br>(GenBank: HQ901766.1) | 96% |
| 15                               | Fungi; Dikarya; Basidiomycota; Agaricomycotina; Agaricomycetes; Agaricomycetidae; Agaricales; Agaricaceae; Agaricus.           | Agaricus bisporus isolate<br>(GenBank: AY787216.1)         | 94% |

<sup>a</sup>the phylogenetic assignment is based on sequences analysis by megablast of GenBank database from NCBI (<http://www.ncbi.nlm.nih.gov>). It is given the phylum as well as the lowest predictable phylogenetic rank.

**Table S6.** Phylogenetic assignment fungi of major DGGE bands Fungal B-h horizon.

| Bands                         | Taxonomic group <sup>a</sup>                    | Closest relatives or cloned sequences (accession no.) | Similarity |
|-------------------------------|-------------------------------------------------|-------------------------------------------------------|------------|
| Natural Forest B-h (18-50 cm) |                                                 |                                                       |            |
| 1                             | Fungi; Dikarya; Basidiomycota; Agaricomycotina; | Cuphophyllus Pratensis                                | 98%        |

|                                 |                                                                                                                            |                                                            |     |
|---------------------------------|----------------------------------------------------------------------------------------------------------------------------|------------------------------------------------------------|-----|
|                                 | <i>Agaricomycetes; Agaricomycetidae; Agaricales; Hygrophoraceae; Cuphophyllus.</i>                                         | (Genbank: Kf291059.1)                                      |     |
| 2                               | Fungi; Dikarya; Basidiomycota; Agaricomycotina; Agaricomycetes; Russulales; Russulaceae; Lactarius.                        | <i>Lactarius Southworthiae</i><br>(Genbank: Kf386755.1)    | 98% |
| 3                               | Fungi; Dikarya; Basidiomycota; Agaricomycotina; Agaricomycetes; Cantharellales; Clavulinaceae; Clavulina.                  | Clavulina Sp.<br>(Genbank: Ay757265.1)                     | 99% |
| 4                               | Fungi; Dikarya; Basidiomycota; Agaricomycotina; Agaricomycetes; Agaricomycetidae; Agaricales; Cortinariaceae; Cortinarius. | Cortinarius Violaceus<br>(Genbank: Ay705950.1)             | 99% |
| 5                               | Fungi;                                                                                                                     | Uncultured Fungi<br>(Genbank: Ef628733.1)                  | 98% |
| 6                               | Fungi; Dikarya; Basidiomycota; Agaricomycotina; Agaricomycetes; Polyporales; Trametes                                      | Trametes Versicolor<br>(Genbank: Ay336751.1)               | 92% |
| 7                               | Fungi; Dikarya; Basidiomycota; Agaricomycotina; Agaricomycetes; Agaricomycetidae; Agaricales; Hygrophoraceae; Neohygrocye  | <i>Neohygrocye Ingrata</i><br>(Genbank: Kf381539.1)        | 94% |
| 8                               | Fungi; Dikarya; Basidiomycota; Agaricomycotina; Agaricomycetes; Hymenochaetales; Hymenochaetaeae; Phellinus                | <i>Phellinus Igniarius</i><br>(Genbank: Hm584803.1)        | 94% |
| 10                              | Fungi; Dikarya; Basidiomycota; Agaricomycotina; Tremellomycetes; Tremellales; Trichosporonaceae; Trichosporon              | <i>Trichosporon multisporum</i><br>(Genbank: Jn939428.1)   | 97% |
| 11                              | Fungi; Dikarya; Basidiomycota; Agaricomycotina; Agaricomycetes; Russulales; Russulaceae; Lactarius                         | <i>Lactarius Southworthiae</i><br>(Genbank: Kf386755.1)    | 99% |
| 13                              | Fungi; Dikarya; Ascomycota; Taphrinomycotina; Archaeorhizomycetales; Archaeorhizomycetaceae; Archaeorhizomyces             | <i>Archaeorhizomyces Borealis</i><br>(GenBank: JF836023.1) | 92% |
| 16                              | Fungi; Dikarya; Basidiomycota; Agaricomycotina; Agaricomycetes; Agaricomycetidae; Agaricales; Tricholomataceae; Tricholoma | <i>Tricholoma sp.</i><br>(Genbank: Kj417173.1)             | 98% |
| Young plantation B-h (18 -50cm) |                                                                                                                            |                                                            |     |
| 1                               | Fungi; Dikarya; Basidiomycota; Agaricomycotina; Agaricomycetes; Agaricomycetidae; Agaricales; Hygrophoraceae; Cuphophyllus | <i>Cuphophyllus Pratensis</i><br>(Genbank: Kf291059.1)     | 98% |
| 2                               | Eukaryota; Fungi; Dikarya; Basidiomycota; Agaricomycotina; Agaricomycetes; Russulales; Russulaceae; Lactarius              | <i>Lactarius Southworthiae</i><br>(Genbank: Kf386755.1)    | 98% |



|                                 |                                                                                                                                          |                                                           |     |
|---------------------------------|------------------------------------------------------------------------------------------------------------------------------------------|-----------------------------------------------------------|-----|
| 3                               | Eukaryota; Fungi; Dikarya; Basidiomycota;<br>Agaricomycotina;<br>Agaricomycetes; Cantharellales; Clavulinaceae;<br>Clavulina.            | Clavulina Sp.<br>(Genbank: Ay757265.1)                    | 99% |
| 4                               | Fungi; Dikarya; Basidiomycota; Agaricomycotina;<br>Agaricomycetes; Agaricomycetidae; Agaricales;<br>Cortinariaceae;<br>Cortinarius       | Cortinarius Violaceus<br>(Genbank: Ay705950.1)            | 99% |
| 5                               | Fungi;                                                                                                                                   | Uncultured Fungus<br>(Genbank: Ef628733.1)                | 98% |
| 6                               | Fungi; Dikarya; Basidiomycota; Agaricomycotina;<br>Agaricomycetes; Russulales; Russulaceae; Lactarius                                    | Lactarius southworthiae voucher. (GenBank:<br>KF386755.1) | 93% |
| 7                               | Fungi; Dikarya; Basidiomycota; Pucciniomy-<br>cotina; Microbotryomycetes; Sporidiobolales; mito-<br>sporic Sporidiobolales; Rhodotorula. | Rhodotorula graminis strain (GenBank:<br>HM371376.1)      | 99% |
| 8                               | Fungi; Dikarya; Basidiomycota; Agaricomycotina;<br>Agaricomycetes; Hymenochaetales; Hymenochaeta-<br>ceae; Phellinus                     | Phellinus Igniarius<br>(Genbank: Hm584803.1)              | 94% |
| 10                              | Fungi; Dikarya; Basidiomycota; Agaricomycotina;<br>Tremellomycetes; Tremellales; Trichosporonaceae;<br>Trichosporon.                     | Trichosporon multisporum<br>(Genbank: Jn939428.1)         | 97% |
| 11                              | Fungi; Dikarya; Basidiomycota; Agaricomycotina;<br>Agaricomycetes; Russulales; Russulaceae; Lactarius.                                   | Lactarius Southworthiae<br>(Genbank: Kf386755.1)          | 99% |
| 13                              | Fungi; Dikarya; Ascomycota; Taphrinomycotina;<br>Archaeorhizomycetales; Archaeorhizomycetaceae; Ar-<br>chaeorhizomyces.                  | Archaeorhizomyces Borealis<br>(GenBank: JF836023.1)       | 92% |
| 15                              | Fungi; Dikarya; Basidiomycota; Agaricomycotina;<br>Agaricomycetes; Cantharellales; Hydnaceae; Hyd-<br>num.                               | Hydnum albomagnum<br>(GenBank: AY665777.1)                | 99% |
| Adult Plantation B-h (18-50 cm) |                                                                                                                                          |                                                           |     |
| 1                               | Fungi; Dikarya; Basidiomycota; Agaricomycotina;<br>Agaricomycetes; Agaricomycetidae; Agaricales; Hy-<br>grophoraceae;<br>Cuphophyllus.   | Cuphophyllus Pratensis<br>(Genbank: Kf291059.1)           | 98% |
| 2                               | Eukaryota; Fungi; Dikarya; Basidiomycota;<br>Agaricomycotina;<br>Agaricomycetes; Russulales; Russulaceae; Lactarius.                     | Lactarius Southworthiae<br>(Genbank: Kf386755.1)          | 98% |
| 3                               | Eukaryota; Fungi; Dikarya; Basidiomycota;<br>Agaricomycotina;<br>Agaricomycetes; Cantharellales; Clavulinaceae;<br>Clavulina.            | Clavulina Sp.<br>(Genbank: Ay757265.1)                    | 99% |
| 6                               | Fungi; Dikarya; Basidiomycota; Agaricomycotina;<br>Agaricomycetes; Russulales; Russulaceae; Lactarius.                                   | Lactarius southworthiae voucher. (GenBank:<br>KF386755.1) | 93% |
| 10                              | Fungi; Dikarya; Basidiomycota; Agaricomycotina;<br>Tremellomycetes; Tremellales; Trichosporonaceae;<br>Trichosporon.                     | Trichosporon Multisporum<br>(Genbank: Jn939428.1)         | 97% |

|                                   |                                                                                                                               |                                                        |      |
|-----------------------------------|-------------------------------------------------------------------------------------------------------------------------------|--------------------------------------------------------|------|
| 12                                | Fungi; Dikarya; Ascomycota; Pezizomycotina; Leotiomyces; Helotiales; Helotiaceae; Chlorociboria.                              | Chlorociboria<br>(Genbank: Ay544713.1)                 | 98%  |
| 13                                | Fungi; Dikarya; Ascomycota; Taphrinomycotina; Archaeorhizomycetales; Archaeorhizomycetaceae.                                  | Archaeorhizomyces Borealis<br>(Genbank: Jf836023.1)    | 92%  |
| 14                                | Fungi; Dikarya; Basidiomycota; Agaricomycotina; Tremellomyces; Tremellales; Tremellaceae.                                     | Uncultured Tremellaceae<br>(GenBank: EF023247.1)       | 100% |
| 15                                | Fungi; Dikarya; Basidiomycota; Agaricomycotina; Agaricomycetes; Cantharellales; Hydnaceae; Hydnum.                            | Hydnum albomagnum<br>(GenBank: AY665777.1)             | 99%  |
| Agricultural Crops B-h (18-50 Cm) |                                                                                                                               |                                                        |      |
| 1                                 | Fungi; Dikarya; Basidiomycota; Agaricomycotina; Agaricomycetes; Agaricomycetidae; Agaricales; Hygrophoraceae; Cuphophyllus.   | Cuphophyllus Pratensis<br>(Genbank: Kf291059.1)        | 98%  |
| 2                                 | Eukaryota; Fungi; Dikarya; Basidiomycota; Agaricomycotina; Agaricomycetes; Russulales; Russulaceae; Lactarius.                | Lactarius Southworthiae<br>(Genbank: Kf386755.1)       | 98%  |
| 3                                 | Eukaryota; Fungi; Dikarya; Basidiomycota; Agaricomycotina; Agaricomycetes; Cantharellales; Clavulinaceae; Clavulina.          | Clavulina Sp.<br>(Genbank: Ay757265.1)                 | 99%  |
| 4                                 | Fungi; Dikarya; Basidiomycota; Agaricomycotina; Agaricomycetes; Agaricomycetidae; Agaricales; Cortinariaceae; Cortinarius.    | Cortinarius Violaceus<br>(Genbank: Ay705950.1)         | 99%  |
| 5                                 | Fungi;                                                                                                                        | Uncultured Fungus<br>(Genbank: Ef628733.1)             | 98%  |
| 6                                 | Fungi; Dikarya; Basidiomycota; Agaricomycotina; Agaricomycetes; Russulales; Russulaceae; Lactarius.                           | Lactarius southworthiae voucher. (GenBank: KF386755.1) | 93%  |
| 7                                 | Fungi; Dikarya; Basidiomycota; Pucciniomycotina; Microbotryomycetes; Sporidiobolales; mitosporic Sporidiobolales; Rhodotorula | Rhodotorula graminis strain (GenBank: HM371376.1)      | 99%  |
| 8                                 | Fungi; Dikarya; Basidiomycota; Agaricomycotina; Agaricomycetes; Hymenochaetales; Hymenochaetaceae; Phellinus                  | Phellinus Igniarius<br>(Genbank: Hm584803.1)           | 94%  |
| 10                                | Fungi; Dikarya; Basidiomycota; Agaricomycotina; Tremellomyces; Tremellales; Trichosporonaceae; Trichosporon.                  | Trichosporon Multisporum<br>(Genbank: Jn939428.1)      | 97%  |
| 11                                | Fungi; Dikarya; Basidiomycota; Agaricomycotina; Agaricomycetes; Russulales; Russulaceae; Lactarius.                           | Lactarius Southworthiae<br>(Genbank: Kf386755.1)       | 99%  |
| 13                                | Fungi; Dikarya; Ascomycota; Taphrinomycotina; Archaeorhizomycetales; Archaeorhizomycetaceae.                                  | Archaeorhizomyces Borealis<br>(Genbank: Jf836023.1)    | 92%  |
| 15                                | Fungi; Dikarya; Basidiomycota; Agaricomycotina;                                                                               | Hydnum albomagnum<br>(GenBank: AY665777.1)             | 99%  |

|                                                        |                                                           |                       |     |
|--------------------------------------------------------|-----------------------------------------------------------|-----------------------|-----|
| <i>Agaricomycetes; Cantharellales; Hydnaceae; Hyd-</i> |                                                           |                       |     |
| <i>num.</i>                                            |                                                           |                       |     |
| <i>Fungi; Dikarya; Basidiomycota; Agaricomycotina;</i> |                                                           | <i>Tricholoma sp.</i> |     |
| 16                                                     | <i>Agaricomycetes; Agaricomycetidae; Agaricales; Tri-</i> | (Genbank: Kj417173.1) | 98% |
| <i>cholomataceae; Tricholoma.</i>                      |                                                           |                       |     |

<sup>a</sup>the phylogenetic assignment is based on sequences analysis by megablast of GenBank database from NCBI (<http://www.ncbi.nlm.nih.gov>). It is given the phylum as well as the lowest predictable phylogenetic rank.
